# Supplementary material for: Enteral nutrition modulation with n-3 PUFAs directs microbiome and lipid metabolism in mice
Source: PubMed Central journal article supplement (PMC7993877; doi:10.1371/journal.pone.0248482), 2021-03-25

# 技术服务报告

项目名称：胆汁酸检测分析

单位名称：浙江大学

联系人：吴漫漫

联系方式：17857685283

电子邮件：

杭州汉库医学检验实验室

2019.12.06

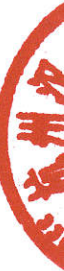

## 肝组织样本及粪便样本中 15 种胆汁酸含量的定量检测

### 1. 仪器及试剂

#### 1.1 试剂

乙腈、甲醇（色谱纯）购自 Merck 公司，甲酸（分析纯）、乙酸铵（分析纯）购自 CNW，超纯水由 CLV-Toc/UF 超纯水仪（Thermo）制备。

标准品：胆酸（CA）、脱氧胆酸（DCA）、甘氨酸胆酸钠盐（GCA）、甘氨酸熊脱氧胆酸（GUDCA）、甘氨酸鹅脱氧胆酸钠盐（GCDCA）、牛磺胆酸钠盐（TCA）、牛磺脱氧胆酸钠盐（TDCA）、甘氨酸石胆酸（GLCA）、熊脱氧胆酸（UDCA）、牛磺石胆酸（TLCA）购自加拿大 TRC 公司；鹅脱氧胆酸（CDCA）、石胆酸（LCA）、甘氨酸脱氧胆酸钠盐（GDCA）、牛磺熊脱氧胆酸钠盐（TUDCA）、牛磺鹅脱氧胆酸钠盐（TCDCA）购自 Sigma-Aldrich；

同位素标准品：CA-d4、UDCA-d4、CDCA-d4 购自 CDN（加拿大），其余的同位素内标购自 TRC（加拿大）。

#### 1.2 设备

超高效液相色谱-三重四极杆质谱联用仪（UPLC/MS/MS）Acquity UPLC® I CLASS XEVO® TQ-S，配有电喷雾（ESI）离子源及 Masslynx 工作站系统，美国 Waters 公司；Legend micro 17R 低温高速离心机，美国 Thermo Scientific 公司；VORTEX3 S025 涡旋混合器，德国 IKA 公司。

### 2. 试剂的制备

内标溶液配制：用甲醇配制 1 mg/mL 的 15 种胆汁酸同位素内标储备液，-20℃ 保存；取适量储备液用甲醇稀释成 0.5 μmol/L 的内标沉淀剂，置-4℃ 条件下保存。

标准溶液配制：15 种胆汁酸标准品用甲醇配制成 1mg/mL 的标准品储备液，-20℃ 保存。分别取适量标准品储备液，稀释成标准曲线绘制所需的系列浓度。

碳酸氢铵溶液：配制成 20 mmol/L 的水溶液。

### 3. 样本制备

#### 3.1 肝组织样本处理

准确称取组织样本约 20 mg（湿重，记录），放入冷冻碾磨仪（球磨仪）中，加 500 μL 内标沉淀剂（4℃）和 500 μL 冷甲醇，碾磨 1 min，完全转移至 1.5 mL 离心管中，在 4℃ 条件下以 13000 rpm 离心 10 min，取 800 μL 上清液至新的离心管中，置于-20℃ 保存。

#### 3.2 粪便样本处理

粪便搅拌均匀，冻干后碾成粉末，准确称量约 100 mg，加入 200 μL 碳酸氢铵溶液。静置 5 min 后，

加入 500  $\mu\text{L}$  内标沉淀剂 (4 $^{\circ}\text{C}$ ) 及 500 $\mu\text{L}$  冷甲醇, 涡旋混匀, 超声萃取 2min, 在 4 $^{\circ}\text{C}$  条件下以 13000 rpm 离心 10 min, 取 800  $\mu\text{L}$  上清液至新的离心管中, 置于 -20 $^{\circ}\text{C}$  保存。

### 3.3 进样前处理

将上述样本取出, 恢复到室温, 准确移取 100  $\mu\text{L}$  样本处理液, 加入 100  $\mu\text{L}$  纯水, 涡旋混匀, 离心后取上清液至进样瓶中待测。

### 3.4 标准曲线样本制备

取 100  $\mu\text{L}$  标准溶液加入 300  $\mu\text{L}$  沉淀剂, 涡旋混匀, 离心后取 100  $\mu\text{L}$  上清, 加入 100  $\mu\text{L}$  纯水, 涡旋混匀, 离心后取上清液至进样瓶中待测。

## 4. UPLC-MS/MS 分析

色谱条件: 色谱柱选用 Acquity UPLC BEH C18 (2.1 $\times$ 100 mm, 1.8  $\mu\text{m}$ ) (Waters); 进样量: 10  $\mu\text{L}$ ; 流速: 0.4mL/min; 柱温: 40 $^{\circ}\text{C}$ ; 流动相 A 为 10 mmol/L 乙酸铵水溶液, 流动相 B 为 0.1%甲酸/甲醇溶液; 梯度洗脱条件: 起始流动相为 35%B, 3 min 升至 60%B, 4.5 min 升至 100%B 保持 0.5 分钟, 后复原至 35%B 平衡 1 分钟。

质谱条件: ESI 正离子模式, 毛细管电压 2500 V, 脱溶剂温度 450 $^{\circ}\text{C}$ , 锥孔电压 30 V, 脱溶剂气 700 L/Hr, 锥孔气为 30, 离子源温度 150 $^{\circ}\text{C}$ 。采用 MRM 模式, 每个化合物两个离子对, 分别用于定量和定性。

定量分析: 采用内标法进行定量, 通过体积校准和重量较准, 获得化合物在粪便和组织中的含量。

## 5. 分析结果

### 5.1 分析方法评估

15 种胆汁酸标准溶液检测结果显示, 在 0.032~100  $\mu\text{mol/L}$  浓度范围内, 线性相关系数均大于 0.995。

质控样本的检测结果表明, 15 种胆汁酸检测结果的 RSD 均小于 15%, 同时质控样本的实际定值和日常质控数值的偏差均小于 15%, 表明测试结果稳定可控。

### 5.2 实际数据分析

根据定量曲线, 结合体积校准, 计算样本中胆汁酸组分含量检测结果如下表:

表 1 样本中胆汁酸组分绝对含量检测结果 (含量单位 pmol)

|      | 重量(mg) | TCA      | TUDCA  | TCDCa  | TDCA   | TLCA  | GCA      | GDCA   | GLCA   | CA       | UDCA     | CDCA    | DCA      | LCA     |
|------|--------|----------|--------|--------|--------|-------|----------|--------|--------|----------|----------|---------|----------|---------|
| G-1  | 20.7   | 1681.05  | 94.94  | 239.19 | 144.31 | 2.88  | 368.36   | 3.62   | 6.76   | 145.40   | 3.75     | 3.10    | 3.06     | 0.11    |
| G-2  | 20.7   | 1011.32  | 170.56 | 258.96 | 275.57 | 4.62  | 136.26   | 3.24   | 3.88   | 17.25    | 1.06     | 1.05    | 1.55     | 0.01    |
| G-3  | 19.6   | 1311.69  | 250.47 | 358.60 | 219.92 | 11.86 | 134.79   | 3.60   | 7.16   | 6.70     | 0.71     | 1.30    | 1.12     | 0.03    |
| G-4  | 21.2   | 6504.68  | 526.23 | 377.25 | 391.05 | 8.01  | 2802.82  | 72.21  | 66.45  | 76.82    | 14.29    | 3.82    | 84.84    | 2.19    |
| G-5  | 20.7   | 11065.14 | 121.02 | 249.36 | 267.09 | 11.97 | 3441.76  | 15.01  | 39.65  | 385.71   | 6.43     | 5.08    | 19.66    | 2.36    |
| G-6  | 21     | 7315.24  | 709.53 | 839.68 | 174.90 | 28.63 | 11522.78 | 345.68 | 593.29 | 277.10   | 61.68    | 32.02   | 14.55    | 3.47    |
| G-7  | 20.8   | 5914.13  | 143.69 | 207.44 | 142.91 | 6.14  | 5155.41  | 47.61  | 83.24  | 171.08   | 7.61     | 4.46    | 6.69     | 1.39    |
| G-8  | 21.5   | 9754.56  | 326.20 | 423.33 | 170.46 | 4.01  | 4188.48  | 31.83  | 65.50  | 1720.33  | 35.65    | 26.97   | 21.98    | 1.77    |
| G-9  | 20.8   | 6376.71  | 140.07 | 298.69 | 44.56  | 3.32  | 4346.98  | 30.41  | 102.00 | 140.82   | 3.85     | 4.16    | 2.94     | 2.53    |
| G-10 | 20.2   | 5938.04  | 252.93 | 461.09 | 74.11  | 3.53  | 2616.80  | 47.27  | 106.37 | 277.86   | 27.11    | 22.75   | 5.44     | 1.24    |
| G-11 | 19.9   | 6805.64  | 306.41 | 288.57 | 149.02 | 9.68  | 1044.05  | 22.72  | 30.64  | 845.99   | 85.99    | 32.27   | 11.08    | 2.32    |
| G-12 | 20.3   | 6196.15  | 110.29 | 612.44 | 247.41 | 39.60 | 8274.23  | 67.44  | 491.44 | 320.47   | 16.25    | 25.21   | 11.84    | 4.94    |
| G-13 | 20     | 4442.79  | 144.01 | 360.44 | 91.80  | 12.33 | 3152.68  | 43.99  | 154.76 | 194.01   | 10.30    | 16.42   | 5.61     | 1.90    |
| F-1  | 101.8  | 64.01    | 30.37  | 208.13 | 26.19  | 12.63 | 27.87    | 4.95   | 21.01  | 1046.40  | 25065.73 | 1255.15 | 13524.73 | 5971.39 |
| F-2  | 54.4   | 381.57   | 167.22 | 75.12  | 71.79  | 3.17  | 187.09   | 23.62  | 8.91   | 1444.88  | 29132.78 | 93.33   | 17613.29 | 3749.23 |
| F-3  | 104.7  | 112.56   | 101.38 | 31.34  | 58.48  | 10.14 | 179.69   | 71.58  | 12.72  | 1949.99  | 40785.50 | 1155.17 | 24665.75 | 5690.31 |
| F-4  | 105.8  | 222.89   | 38.09  | 53.25  | 73.46  | 1.57  | 52.53    | 14.60  | 4.74   | 9556.07  | 34823.54 | 1244.90 | 30404.11 | 3639.27 |
| F-5  | 101.9  | 92.23    | 25.13  | 58.03  | 48.74  | 4.19  | 90.93    | 11.93  | 31.12  | 6014.53  | 25930.06 | 1423.23 | 24057.43 | 4926.52 |
| F-6  | 99.7   | 497.11   | 107.28 | 34.23  | 237.46 | 11.18 | 8.05     | 2.14   | 0.46   | 8223.92  | 15837.48 | 289.80  | 17771.41 | 1980.21 |
| F-7  | 81.3   | 542.67   | 145.00 | 62.26  | 404.49 | 25.89 | 9.66     | 7.56   | 0.50   | 4231.23  | 14453.94 | 144.71  | 14919.33 | 1362.19 |
| F-8  | 56.2   | 4993.87  | 162.93 | 117.59 | 11.89  | 0.80  | 114.30   | 1.78   | 0.67   | 16986.42 | 3890.93  | 2762.94 | 159.98   | 217.56  |
| F-9  | 60.9   | 4588.35  | 314.18 | 142.91 | 411.06 | 10.61 | 122.65   | 2.28   | 4.25   | 14856.78 | 4452.45  | 1976.68 | 8243.20  | 707.56  |
| F-10 | 74.5   | 26731.56 | 111.73 | 72.52  | 9.68   | 1.33  | 451.26   | 6.46   | 3.08   | 16444.52 | 7413.57  | 3003.69 | 71.34    | 197.32  |
| F-11 | 49.5   | 3980.48  | 92.61  | 52.42  | 18.08  | 1.07  | 76.13    | 1.54   | 1.65   | 12735.00 | 2460.26  | 1144.67 | 581.06   | 234.23  |
| F-12 | 64.6   | 5451.85  | 213.29 | 160.30 | 4.60   | 1.62  | 106.67   | 2.53   | 4.79   | 16199.08 | 4588.30  | 3570.51 | 40.23    | 214.83  |
| F-13 | 56.6   | 10779.76 | 154.57 | 97.92  | 9.79   | 0.90  | 169.33   | 2.58   | 2.51   | 14870.00 | 3735.99  | 1793.13 | 65.29    | 184.23  |

表 2 样本中胆汁酸组分浓度检测结果 (含量单位 nmol/g)

|      | TCA     | TUDCA  | TCDCa  | TDCA   | TLCA  | GCA     | GUDCA  | GCDCA  | GDCA  | GLCA  | CA      | UDCA    | CDCA   | DCA     | LCA    |
|------|---------|--------|--------|--------|-------|---------|--------|--------|-------|-------|---------|---------|--------|---------|--------|
| G-1  | 81.210  | 4.586  | 11.555 | 6.971  | 0.139 | 17.795  | 0.175  | 0.327  | 0.173 | 0.014 | 7.024   | 0.181   | 0.150  | 0.148   | 0.005  |
| G-2  | 48.856  | 8.240  | 12.510 | 13.313 | 0.223 | 6.583   | 0.157  | 0.187  | 0.228 | 0.007 | 0.833   | 0.051   | 0.051  | 0.075   | 0.000  |
| G-3  | 66.923  | 12.779 | 18.296 | 11.220 | 0.605 | 6.877   | 0.184  | 0.365  | 0.254 | 0.008 | 0.342   | 0.036   | 0.066  | 0.057   | 0.002  |
| G-4  | 306.825 | 24.822 | 17.795 | 18.446 | 0.378 | 132.208 | 3.406  | 3.134  | 4.270 | 0.026 | 3.624   | 0.674   | 0.180  | 4.002   | 0.103  |
| G-5  | 534.548 | 5.846  | 12.046 | 12.903 | 0.578 | 166.269 | 0.725  | 1.915  | 3.478 | 0.085 | 18.633  | 0.311   | 0.245  | 0.950   | 0.114  |
| G-6  | 348.345 | 33.787 | 39.985 | 8.329  | 1.363 | 548.704 | 16.461 | 28.252 | 6.712 | 0.317 | 13.195  | 2.937   | 1.525  | 0.693   | 0.165  |
| G-7  | 284.333 | 6.908  | 9.973  | 6.871  | 0.295 | 247.856 | 2.289  | 4.002  | 3.656 | 0.055 | 8.225   | 0.366   | 0.214  | 0.322   | 0.067  |
| G-8  | 453.700 | 15.172 | 19.690 | 7.928  | 0.187 | 194.813 | 1.480  | 3.047  | 1.193 | 0.019 | 80.015  | 1.658   | 1.254  | 1.022   | 0.082  |
| G-9  | 306.573 | 6.734  | 14.360 | 2.142  | 0.160 | 208.989 | 1.462  | 4.904  | 0.924 | 0.041 | 6.770   | 0.185   | 0.200  | 0.141   | 0.122  |
| G-10 | 293.962 | 12.521 | 22.826 | 3.669  | 0.175 | 129.545 | 2.340  | 5.266  | 1.433 | 0.023 | 13.755  | 1.342   | 1.126  | 0.269   | 0.061  |
| G-11 | 341.992 | 15.397 | 14.501 | 7.488  | 0.486 | 52.465  | 1.142  | 1.540  | 1.013 | 0.038 | 42.512  | 4.321   | 1.622  | 0.557   | 0.117  |
| G-12 | 305.229 | 5.433  | 30.169 | 12.188 | 1.951 | 407.598 | 3.322  | 24.209 | 9.065 | 0.540 | 15.787  | 0.800   | 1.242  | 0.583   | 0.243  |
| G-13 | 222.140 | 7.201  | 18.022 | 4.590  | 0.617 | 157.634 | 2.200  | 7.738  | 2.880 | 0.142 | 9.701   | 0.515   | 0.821  | 0.281   | 0.095  |
| F-1  | 0.629   | 0.298  | 2.044  | 0.257  | 0.124 | 0.274   | 0.049  | 0.206  | 0.175 | 0.077 | 10.279  | 246.225 | 12.330 | 132.856 | 58.658 |
| F-2  | 7.014   | 3.074  | 1.381  | 1.320  | 0.058 | 3.439   | 0.434  | 0.164  | 0.525 | 0.036 | 26.560  | 535.529 | 1.716  | 323.774 | 68.920 |
| F-3  | 1.075   | 0.968  | 0.299  | 0.559  | 0.097 | 1.716   | 0.684  | 0.121  | 0.845 | 0.125 | 18.625  | 389.546 | 11.033 | 235.585 | 54.349 |
| F-4  | 2.107   | 0.360  | 0.503  | 0.694  | 0.015 | 0.497   | 0.138  | 0.045  | 1.039 | 0.024 | 90.322  | 329.145 | 11.767 | 287.373 | 34.398 |
| F-5  | 0.905   | 0.247  | 0.569  | 0.478  | 0.041 | 0.892   | 0.117  | 0.305  | 0.509 | 0.046 | 59.024  | 254.466 | 13.967 | 236.089 | 48.347 |
| F-6  | 4.986   | 1.076  | 0.343  | 2.382  | 0.112 | 0.081   | 0.021  | 0.005  | 0.264 | 0.020 | 82.487  | 158.851 | 2.907  | 178.249 | 19.862 |
| F-7  | 6.675   | 1.784  | 0.766  | 4.975  | 0.318 | 0.119   | 0.093  | 0.006  | 0.700 | 0.072 | 52.045  | 177.785 | 1.780  | 183.510 | 16.755 |
| F-8  | 88.859  | 2.899  | 2.092  | 0.212  | 0.014 | 2.034   | 0.032  | 0.012  | 0.652 | 0.006 | 302.249 | 69.234  | 49.163 | 2.847   | 3.871  |
| F-9  | 75.342  | 5.159  | 2.347  | 6.750  | 0.174 | 2.014   | 0.037  | 0.070  | 0.598 | 0.009 | 243.954 | 73.111  | 32.458 | 135.356 | 11.618 |
| F-10 | 358.813 | 1.500  | 0.973  | 0.130  | 0.018 | 6.057   | 0.087  | 0.041  | 0.338 | 0.003 | 220.732 | 99.511  | 40.318 | 0.958   | 2.649  |
| F-11 | 80.414  | 1.871  | 1.059  | 0.365  | 0.022 | 1.538   | 0.031  | 0.033  | 0.268 | 0.007 | 257.273 | 49.702  | 23.125 | 11.739  | 4.732  |
| F-12 | 84.394  | 3.302  | 2.481  | 0.071  | 0.025 | 1.651   | 0.039  | 0.074  | 0.352 | 0.005 | 250.760 | 71.026  | 55.271 | 0.623   | 3.326  |
| F-13 | 190.455 | 2.731  | 1.730  | 0.173  | 0.016 | 2.992   | 0.046  | 0.044  | 0.301 | 0.006 | 262.721 | 66.007  | 31.681 | 1.154   | 3.255  |

## 免责声明

1. 测试结果仅对所送检的样品负责。本项目中的样本采集、分装、预处理和邮寄均由测试委托单位（浙江大学）完成，由此导致的结果不确定性由委托单位负责。
2. 委托单位应对送检样品的代表性、样品信息等资料的真实性负责，本实验室不承担任何相关责任。
3. 分析检测样本及检测原始数据将在本实验室保留 30 天。如委托单位对分析结果有异议，需在 15 日自然日内以书面方式与本实验室取得联系。超过 15 个自然日，将视为委托单位对本报告内容和检测结果无疑义。超过 30 个自然日，本实验室有权按照标准规程自行废弃标本和删除原始数据。
4. 本测试结果仅用于科学研究，包括数据分析、性能评价和质量分析等。如有其他用途，须与本实验室沟通确认。本实验室不承担任何未经确认的测试结果使用所导致的直接和/或间接经济损失、法律责任。
5. 测试结果以本报告提供的数据为准。本实验室不承担任何因涂改、篡改、冒用等不良行为所导致的经济损失、法律责任。
6. 杭州汉库医学检验实验室的联系方式如下：  
联系人：金钱星；移动电话：15925661166；E-mail: jqx@hankoo.cn。

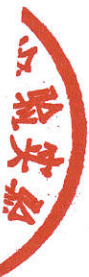

Supplement: pone.0248482.s004.pdf [file pone.0248482.s004.pdf]
